# Supplementary material for: Large language models for autism: evaluating theory of mind tasks in a gamified environment
Source: Sci Rep. 2025 Oct 6;15:34763. doi: 10.1038/s41598-025-18608-4 (PMC12501279; doi:10.1038/s41598-025-18608-4)
Supplement: Supplementary file 3 — Supplementary Material 3 [file 41598_2025_18608_MOESM3_ESM.xlsx]

## Sheet: Questionnaire
Questions	Answers
General questions
What is your profession? (e.g. doctor, clinical psychologist, ...)
How long have you been working in this field?
Do you work with people with autism spectrum disorder?
Do you use theory of mind tasks in your work?
After scoring all answers
How difficult did you find it to decide whether an answer should be rated as correct or incorrect? (On a scale from 1 to 10: 1 = very difficult, 10 = very easy)
How long did it take you in total to score all the answers?

## Sheet: Sample
Task 1	Points	Task 2	Points	Task 3	Points	Task 4	Points	Task 5	Points	Task 6	Points	Task 7	Points	Task 8	Points
Did anyone say something they shouldn't have said or something awkward?: Yes		Did anyone say something they shouldn't have said or something awkward?: No		Did Hanna think that her employee was working hard today?: No		Did Paul's wife think he had bought everything they needed?: Yes		What did Clara really mean when she said this?: That her husband should take the dog out		What did Charlie really mean when he said this?: I do not know. Maybe he is saying the truth or maybe he just wants to leave.		Did Thomas mean what he said about the chairs?: No		Did Melissa mean what she said?: Yes
Who said something they shouldn't have said or something awkward?: Kevin		Who said something they shouldn't have said or something awkward?: -		What could have been a reason for Hanna to say this?: He watched a movie		What could have been a reason for Paul's wife to say this?: If she really believes it or if she does not want to end up in a discussion/conflict. There is not enough information given to answer such questions. I used yes but actually not enough information and context was given. I could just as well answered with no.		What reaction could Clara have hoped for?: That her husband volunteers to take the dog out		What reaction could Charlie have hoped for?: I do not know as I do not know Charlie.		Why did Thomas say that?: Obviously because he likes to please his boss. I would not do that but stick to my preferences.		Why did Melissa say that?: The storyline says that she did not like lasagne as a kid but now likes it. She might have said Yes, I love lasagne however also for avoiding a situation of awkwardness
What did they say that they should not have said?: About the ugliness of black cats		What did they say that they should not have said?: -		How could Hanna have felt in this situation?: Angry maybe		How could Paul's wife have felt in this situation?: Maybe awkward, maybe not		Did Clara want her husband to do something?: Yes		Did Charlie want Olivia to do something?: Yes		How could Thomas have felt in this situation?: No idea. Depends on his character.		How could Melissa have felt in this situation?: See other answer. Many options. She might have preferred to be have been asked in advance what she likes and what she does not like.
Why shouldn't they have said it or why was it awkward?: Because it might make Sarah feel bad		Why shouldn't they have said it or why was it awkward?: -		Who was the boss of the company?: Hanna		What did Paul buy?: A lot of groceries		What did Clara and her husband do?: Work (on the laptop)		What did Olivia and Charlie do?: Working the in the office until late in the evening		How could Thomas's boss have felt when he heard Thomas's response?: No idea either. It depends how well they know each other and their preferences.		How could Melissa's friend have felt when she heard Melissa's response?: Either be happy or not
Why do you think they said it?: Who? Kevin? Because he was honest		Why do you think they said it?: -		What did the employee do when Hanna walked by?: Watch a movie		What did Paul and his wife want to do that evening?: Have dinner		What was the puppy's name?: Max		What kind of pain did Charlie experience?: Headache but we do not know if he is honest		Who did Thomas talk to?: To his long time boss		Who did Melissa talk to?: To her host
Is it more likely that Kevin knew or did not know that Sarah has a black cat?: The latter		Is it more likely that Caleb's colleagues knew or did not know that Caleb could hear them?: Probably that they could not hear them if they are neurotypical at least or are masking if they are neurodiverse.										What did Thomas's boss buy for the office?: New chairs		What did Melissa's friend cook?: Lasagne
How do you think Sarah felt?: Depends on her. Maybe just what a stupid guy		How do you think Caleb felt?: Depends on his character. Some people might have thought that there was something wrong with the cup cakes.
Where did Sarah start the conversation with Kevin?: In a shop		Where were Caleb's colleagues during their conversation?: In an office with an open door
What did Sarah want to buy?: Cat food		What did Caleb bring to the office?: Cup cakes
